## Direct Regulation of GnRH Neuron Excitability by Arcuate Nucleus POMC and NPY Neuron Neuropeptides in Female Mice

Juan Roa and Allan E. Herbison

Centre for Neuroendocrinology (J.R., A.E.H.), Department of Physiology, University of Otago School of Medical Sciences, Dunedin 9054, New Zealand; and Centro de Investigación Biomédica en Red Fisiopatología de la Obesidad y Nutrición (J.R.), Instituto de Salud Carlos III, and Instituto Maimónides de Investigaciones Biomédicas (J.R.), 14004 Córdoba, Spain

Hypothalamic neuropeptide Y (NPY) and proopiomelanocortin (POMC) neurons act to sense and coordinate the brain's responses to metabolic cues. One neuronal network that is very sensitive to metabolic status is that controlling fertility. In this study, we investigated the impact of neuropeptides released by NPY and POMC neurons on the cellular excitability of GnRH neurons, the final output cells of the brain controlling fertility. The majority (~70%) of GnRH neurons were activated by  $\alpha$ -melanocyte-stimulating hormone, and this resulted from the direct postsynaptic activation of melanocortin receptor 3 and melanocortin receptor 4. A small population of GnRH neurons (~15%) was excited by cocaine and amphetamine-regulated transcript or inhibited by  $\beta$ -endorphin. Agouti-related peptide, released by NPY neurons, was found to have variable inhibitory (~10%) and stimulatory (~25%) effects upon subpopulations of GnRH neurons. A variety of NPY and pancreatic polypeptide analogs was used to examine potential NPY interactions with GnRH neurons. Although porcine NPY (Y1/Y2/Y5 agonist) directly inhibited the firing of approximately 45% of GnRH neurons, [Leu<sup>31</sup>,Pro<sup>34</sup>]-NPY (Y1/Y4/Y5 agonist) could excite (56%) or inhibit (19%). Experiments with further agonists indicated that Y1 receptors were responsible for suppressing GnRH neuron activity, whereas postsynaptic Y4 receptors were stimulatory. These results show that the activity of GnRH neurons is regulated in a complex manner by neuropeptides released by POMC and NPY neurons. This provides a direct route through which different metabolic cues can regulate fertility. (*Endocrinology* 153: 5587–5599, 2012)

The integration of metabolic cues by the neuronal network controlling fertility is critical for the appropriate timing of puberty and reproduction in mammals (1, 2). States of under- or overnutrition result in disordered fertility in mice and humans (3, 4). Circulating leptin concentrations, reflecting fat stores, provide one important cue to the fertility network and act as a permissive regulator of puberty onset and ovarian cyclicity (1). Equally, insulin is also emerging as an important peripheral signal that may impact upon reproductive status (5).

The GnRH neurons represent the final output cell of the neuronal network controlling fertility in all mammals, and

investigators are presently unraveling the mechanisms and pathways through which leptin and insulin modulate the activity of these cells. Evidence now indicates that neither leptin nor insulin act directly upon GnRH neurons to regulate fertility (6–8). Instead, these hormones likely modulate the activity of multiple different afferent inputs to GnRH neurons. Recent work has demonstrated that neurons located in the ventral premammillary nucleus play an important role in mediating the actions of leptin on GnRH neurons (9–11). More generally, the proopiomelanocortin (POMC)/cocaine and amphetamine-regulated transcript (CART) and neuropeptide Y (NPY)/agouti-related

ISSN Print 0013-7227 ISSN Online 1945-7170  
Printed in U.S.A.

Copyright © 2012 by The Endocrine Society  
doi: 10.1210/en.2012-1470 Received April 25, 2012. Accepted August 8, 2012.  
First Published Online September 4, 2012

Abbreviations: aCSF, Artificial cerebrospinal fluid; AgRP, agouti-related peptide; ARN, arcuate nucleus; CART, cocaine and amphetamine-regulated transcript; GFP, green fluorescent protein; hPP, human PP; MC3R, melanocortin receptor 3; MSH, melanocyte-stimulating hormone; NPY, neuropeptide Y; pNPY, porcine NPY; POMC, proopiomelanocortin; rPP, rat pancreatic polypeptide; TTX, tetrodotoxin.

peptide (AgRP) neurons of the arcuate nucleus (ARN) are established as important mediators of leptin and insulin actions on multiple neuronal networks, including that regulating food intake (12). Although the involvement of these ARN neurons in regulating fertility is attractive, in that it would enable the coordinated control of feeding and reproduction by leptin and insulin, evidence is controversial. Early studies examining mice with POMC-specific deletions of the leptin receptor found no reproductive phenotype (13, 14), whereas more recent investigations using mutant mice with both individual and coupled leptin and insulin receptor deletions have revealed substantial reproductive deficits (15).

An essential piece of evidence supporting a role for POMC and NPY neurons in regulating GnRH neurons would be the demonstration that they can modulate GnRH neuron excitability directly. Present evidence exists for direct inputs from uncharacterized ARN neurons to GnRH cells in the mouse (16), and both NPY and POMC terminals can be identified synapsing on GnRH neurons (17, 18). However, to date, there has only been a single study examining the effects of NPY on adult GnRH neuron excitability (19). In the present series of studies, we have investigated the effects of a range of neuropeptides released by POMC and NPY neurons on adult female mouse GnRH neurons and characterized the receptor subtypes mediating their different actions.

## Materials and Methods

### Experimental animals

Adult female GnRH-green fluorescent protein (GFP) mice (20) were housed under constant conditions of light (12 h of light, from 0700 h) and temperature (22 C) with *ad libitum* access to food and water. Diestrous female mice were used for all experiments with the estrous cycle stage determined by daily vaginal smear. Experimental procedures were approved by the University of Otago Animal Welfare and Ethics Committee.

### Brain slice preparation and electrophysiology

Animals were killed by cervical dislocation between 1000 and 1130 h, and brain was dissected and cut into 200- $\mu$ m-thick sagittal slices with a vibratome (Leica VT1000S; Leica, Heerbrugg, Switzerland). During the slicing procedure, the brain was immersed in cold ( $\sim$ 4 C), oxygenated artificial cerebrospinal fluid (aCSF) containing: 118 mM NaCl, 3 mM KCl, 11 mM D-glucose, 10 mM HEPES, 25 mM NaHCO<sub>3</sub>, 0.5 mM CaCl<sub>2</sub>, and 6 mM MgCl<sub>2</sub>. Brain slices were transferred to a slice chamber (heated at  $30 \pm 2$  C) containing oxygenated "recording aCSF": 118 mM NaCl, 3 mM KCl, 11 mM D-glucose, 10 mM HEPES, 25 mM NaHCO<sub>3</sub>, 2.5 mM CaCl<sub>2</sub>, and mM 1.2 MgCl<sub>2</sub> (pH 7.3) for at least 1 h before recording. Loose-patch, whole-cell, or perforated-patch recordings were undertaken in slices placed in a recording chamber perfused with aCSF at 2–3 ml/min, maintained at  $32 \pm 1$  C, and mounted in a fixed-stage upright fluorescence microscope (BX51WI; Olympus, Tokyo, Japan). GnRH-GFP neurons were identified briefly using fluorescence and then patched under differential interference contrast microscopy (using a  $\times 40$  water-immers-

**TABLE 1.** Effects of POMC and NPY neuron-released neuropeptides and agonists on GnRH neurons

| Treatment                                       | Receptor affinity | Dose        | Total no. | Activation | Inhibition | No response |
|-------------------------------------------------|-------------------|-------------|-----------|------------|------------|-------------|
| POMC neuron-released neuropeptides and agonists |                   |             |           |            |            |             |
| $\alpha$ -MSH                                   |                   | 1 $\mu$ M   | (n = 13)  | 9          | 0          | 4           |
| CART                                            |                   | 1 $\mu$ M   | (n = 8)   | 2          | 0          | 6           |
|                                                 |                   | 100 nM      | (n = 5)   | 0          | 0          | 5           |
| $\beta$ -Endorphin                              |                   | 0.5 $\mu$ M | (n = 11)  | 0          | 2          | 9           |
|                                                 |                   | 10 $\mu$ M  | (n = 3)   | 0          | 0          | 3           |
| DAMGO                                           |                   | 1 $\mu$ M   | (n = 2)   | 0          | 0          | 2           |
| MCR4 agonist                                    | MC4R              | 10 nM       | (n = 6)   | 4          | 0          | 2           |
| D-Trp- $\gamma$ -MSH                            | MC3R              | 10 nM       | (n = 6)   | 4          | 0          | 2           |
| NPY neuron-released neuropeptides and agonists  |                   |             |           |            |            |             |
| pNPY                                            | Y1/Y2/Y5          | 300 nM      | (n = 13)  | 0          | 6          | 7           |
|                                                 |                   | 100 nM      | (n = 4)   | 0          | 0          | 4           |
| NPY Y5 agonist                                  | Y5                | 300 nM      | (n = 4)   | 0          | 0          | 4           |
|                                                 |                   | 100 nM      | (n = 5)   | 0          | 0          | 5           |
|                                                 |                   | 10 nM       | (n = 4)   | 0          | 0          | 4           |
| (Leu <sup>31</sup> ,Pro <sup>34</sup> )-NPY     | Y1/Y4/Y5          | 300 nM      | (n = 6)   | 3          | 2          | 1           |
|                                                 |                   | 100 nM      | (n = 8)   | 3          | 0          | 5           |
| rPP                                             | Y4                | 300 nM      | (n = 10)  | 3          | 0          | 7           |
|                                                 |                   | 30 nM       | (n = 11)  | 3          | 0          | 8           |
| AgRP                                            | MC3R/MC4R         | 100 nM      | (n = 11)  | 3          | 1          | 7           |
|                                                 |                   | 10 nM       | (n = 13)  | 3          | 1          | 9           |

*Upper panel.* No. of GnRH neurons displaying activation, inhibition, or no response to selected neuropeptides released by POMC neurons and specific agonists in loose-patch configuration. Treatments that failed to elicit responses to low dose were assessed at a higher (10-fold) dose.

*Lower panel.* No. of GnRH neurons showing activation, inhibition, or no response to selected NPY agonist receptors and AgRP at different concentrations in loose-patch mode. Principal receptor affinity for each drug is also indicated in the *second column*. Data on selectivities of NPY analogues at different NPY receptors compiled from Refs. 83–86. NPY Y5 agonist, [C<sup>1</sup>PP1-7, NPY19-23, Ala<sup>31</sup>, Aib<sup>32</sup>, Gln<sup>34</sup>]-hPP. MCR4 agonist, Cyclo (-Ala-His-D-Phe-Arg-Trp-Glu)-NH<sub>2</sub>.

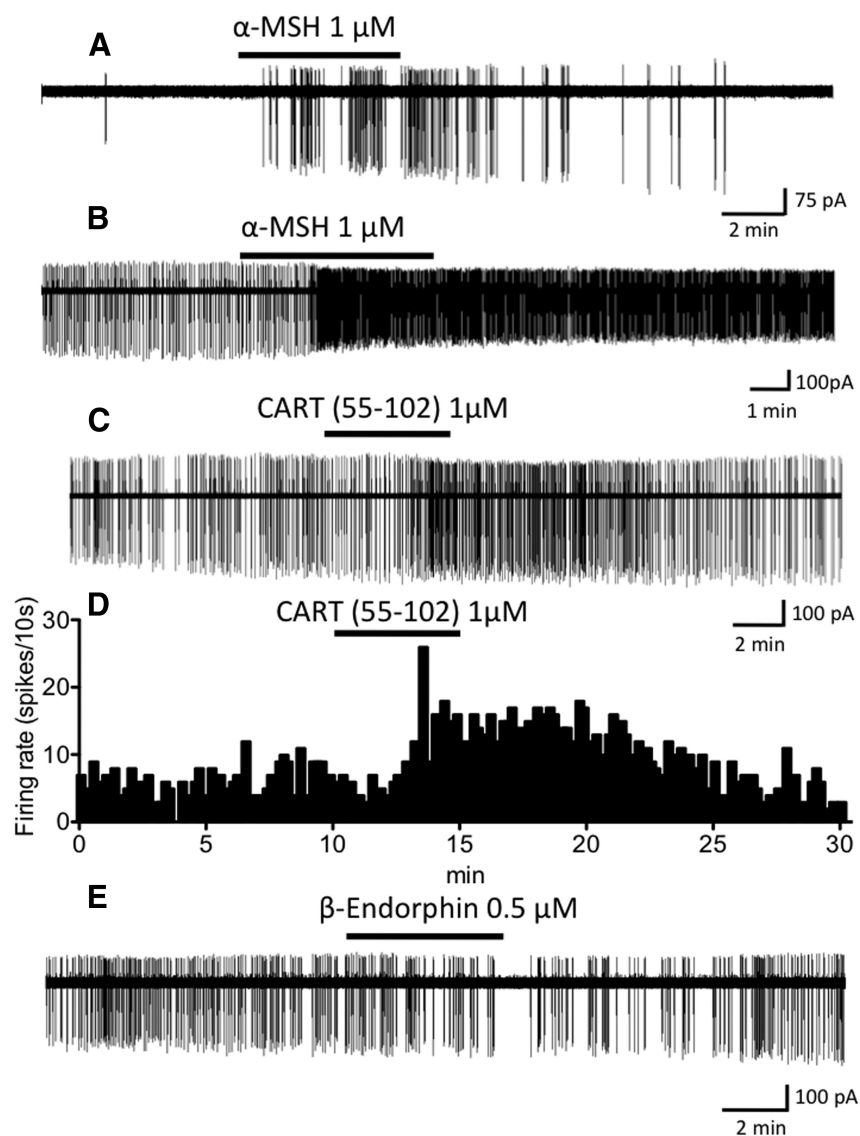

**FIG. 1.** Effects of neuropeptides released by POMC neurons on GnRH firing. Voltage-clamp recordings were made from GnRH neurons in loose-patch configuration.  $\alpha$ -MSH (A and B), and to a lesser extent CART (C), application to the bath solution for a 5-min period increased GnRH cell firing, whereas  $\beta$ -endorphin (E) marginally decreased activity. D, Frequency-time histogram of firing rate displayed by the cell shown in C.

sion objective). Recording electrodes were pulled from borosilicate glass capillaries with a microelectrode puller (model P-97; Sutter Instruments, Navato, CA). Electrodes (resistances 3–5 M $\Omega$ ) for loose-patch recording were filled with the following solution: 135 mM K-gluconate (D-gluconic acid K salt), 5 mM NaCl, 10 mM HEPES, 10 mM EGTA, 1 mM MgCl<sub>2</sub>, 1 mM CaCl<sub>2</sub>, 5 mM MgATP, and 0.1 mM Na<sub>2</sub>GTP (pH 7.32 adjusted with 1 M KOH). For whole-cell recording, the pipette solution contained: 135 mM K-gluconate (D-gluconic acid K salt), 5 mM NaCl, 10 mM HEPES, 1 mM BAPTA, 0.22 mM CaCl<sub>2</sub>, 0.2 mM Na<sub>2</sub>ATP, 2 mM MgATP, 0.2 mM Na<sub>2</sub>GTP, and 7 mM phosphocreatine-Tris (pH 7.32). Perforated-patch recording was undertaken as described previously (21). In brief, gramicidin 10 mg/ml (Sigma Ltd., Auckland, New Zealand), dissolved in dimethylsulfoxide, was diluted to a final concentration of 30  $\mu$ g/ml in whole-cell pipette solution just before use and sonicated for 3 min. Then, GnRH-GFP neurons were patched to gigaohm

seal, and access resistance was monitored until 50–90 M $\Omega$  was reached (~30–40 min). Voltage and current signals were obtained using a Multiclamp 700B amplifier (CV7B; Molecular Devices, Foster City, CA) and sampled online with the use of a Digidata 1440 A interface (Molecular Devices) connected to a personal computer. Acquisition and subsequent analysis of the acquired data were performed using the Clampex 10 suite of software (Molecular Devices).

For loose-patch experiments, neurons were recorded for at least 15–20 min before drug application to ensure the stability of the recording. Drugs were applied for 5 min followed by 10–15 min of wash-out period. In whole-cell and perforated-patch configuration, drugs were applied for a 3- to 4-min period. In whole-cell and perforated-patch experiments, liquid junction potential was not corrected.

### Analysis

In loose-patch experiments, cells were considered to have responded using the following criteria: the mean action current frequency was calculated during the 5-min period before drug exposure and during the last 4 min of drug application. If the mean frequency during the treatment was higher or lower than that of the control period plus twice the SD, the cell was considered to have been excited or inhibited, respectively.

In whole-cell and perforated-patch experiments, effects of drugs on membrane potential were assessed by determining the mean membrane potential 1 min before drug exposure and 1 min corresponding to the maximal response within the treatment period. If the average of the 1-min treatment was more than the average of the 1-min pretreatment period plus two times the SD, the difference was considered significant. To perform this analysis in cells showing spontaneous activity, filtering of action potentials was achieved by sampling at 4 kHz and filtering with a Gaussian low-pass filtering (–3 dB cutoff at 0.8 Hz) in Clampfit.

### Drugs

The following neuropeptides were used. For POMC neurons;  $\alpha$ -melanocyte-stimulating hormone (MSH), mouse  $\beta$ -endorphin, and rat CART 55–102 (all from Bachem, Bubendorf, Switzerland), melanocortin receptor 3 (MC3R) agonist, D-Trp- $\gamma$  MSH (American Peptide Co., Inc., Sunnyvale, CA) and MC4R agonist, Cyclo ( $\beta$ -Ala-His-D-Phe-Arg-Trp-Glu)-NH<sub>2</sub> (Phoenix Pharmaceuticals, Inc., Burlingame, CA), the  $\mu$ -opioid receptor-specific agonist (D-Ala<sup>2</sup>), N-Me-Phe<sup>4</sup>, glycyl<sup>5</sup>-Enkephalin (DAMGO) (Bachem). For NPY neurons, mouse AgRP (82–131)-amide (Phoenix Pharmaceuticals, Inc.) porcine NPY (pNPY)

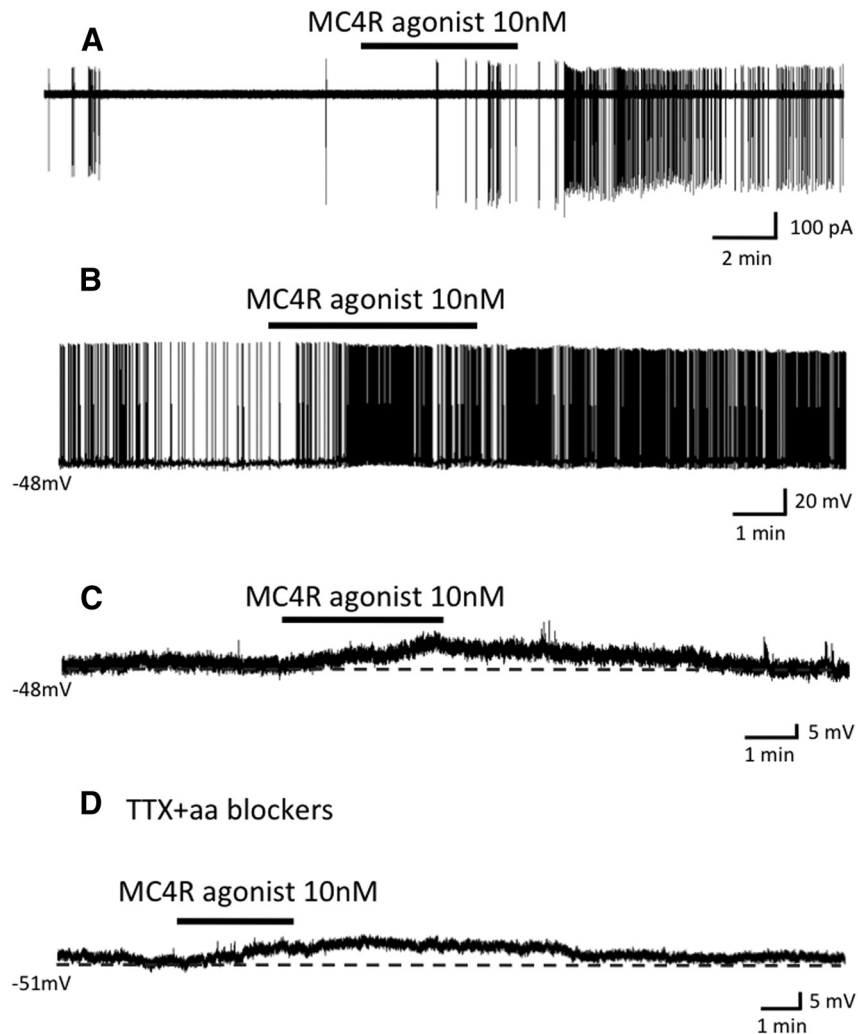

**FIG. 2.** MC4R agonist excites GnRH neurons. A, Representative recording, in loose-patch mode, of the long-lasting activation produced by MC4R agonist on GnRH neurons. The same effect was confirmed in whole-cell configuration (B and C). The increase in frequency of action potentials was accompanied by a modest depolarization (B), although this depolarization did not evoke action potentials in some cells (C). Depolarization produced by MC4R agonist persists in presence of TTX and amino acid (aa) blockers (D).

and rat pancreatic polypeptide (rPP) (from Bachem). [Leu<sup>31</sup>, Pro<sup>34</sup>]-NPY (human, rat) and [cPP1-7, NPY19-23, AL<sup>31</sup>, Aib<sup>32</sup>, Gln<sup>34</sup>]-human PP (hPP) were from Tocris Bioscience (Ellisville, MO). In some cells, 20  $\mu$ M 6-cyano-7-nitroquinoxaline-2, 3-dione, 20  $\mu$ M DL-2-amino-5-phosphonopentanoic acid, picrotoxin 100  $\mu$ M, and 0.5  $\mu$ M tetrodotoxin (TTX) were included in the perfused aCSF solution during the recording to block presynaptic transmission. All the drugs were prepared in double distilled H<sub>2</sub>O (except picrotoxin, in dimethylsulfoxide) at 10<sup>3</sup> times final concentration, stored at -20 C, and diluted in aCSF just before use.

## Results

In all cases, the numbers of GnRH neurons tested are annotated using “n,” whereas the numbers of animals used are given as “N” in parentheses.

### Effects of neuropeptides released by POMC neurons on GnRH neurons

#### *$\alpha$ -MSH and CART stimulate, whereas $\beta$ -endorphin reduces, GnRH neuronal activity*

The effects of POMC-derived neuropeptides ( $\alpha$ -MSH and  $\beta$ -endorphin) and CART were initially assessed on GnRH neurons using loose-patch recordings (results summarized in Table 1, upper panel).

Application of  $\alpha$ -MSH (1  $\mu$ M) (based on previous publications, see Refs. 22, 23) for 5 min produced an increase in the firing rate of nine of 13 (69%) GnRH neurons (N = 6) (Fig. 1, A and B). Two responding cells were activated from relative silence in the pretest period (Fig. 1A), and the remaining seven spontaneously active cells exhibited a robust 2- to 50-fold increase in firing rate (Fig. 1B). Four cells did not respond. For all experiments, cells that were silent and did not respond to drugs were tested with 20 mM KCl at the end of the experiment and only included in the analysis if they responded to this challenge.

CART was tested at 100 nM and 1  $\mu$ M (24). Exposure of five GnRH neurons (N = 4) to 100 nM CART had no effect on cell firing. At 1  $\mu$ M, two of eight (25%) GnRH neurons (n = 6) exhibited a modest, approximately 2-fold, increase in firing rate (Fig. 1, C and D).

$\beta$ -Endorphin at 0.5  $\mu$ M (25) decreased the firing rate of two of 11 GnRH neurons (n = 7) by approximately 30% (Fig. 1E). The remaining cells were unaffected. To test this response further, five GnRH neurons (N = 4) were tested with 1 or 10  $\mu$ M DAMGO (26), the  $\mu$ -opioid receptor agonist, but none responded.

#### *$\alpha$ -MSH excites GnRH neurons through both MC3R and MC4R*

The above studies showed that, of the POMC neuron-secreted peptides,  $\alpha$ -MSH exerted the most potent actions. Because MC3R and MC4R are the only melanocortin receptors expressed at appreciable levels in the brain (27, 28), we used specific agonists at these receptors to examine further the  $\alpha$ -MSH actions on GnRH neurons.

In loose-patch recordings, 10 nM Cyclo ( $\beta$ -Ala-His-D-Phe-Arg-Trp-Glu)-NH<sub>2</sub>, the MC4R agonist (29),

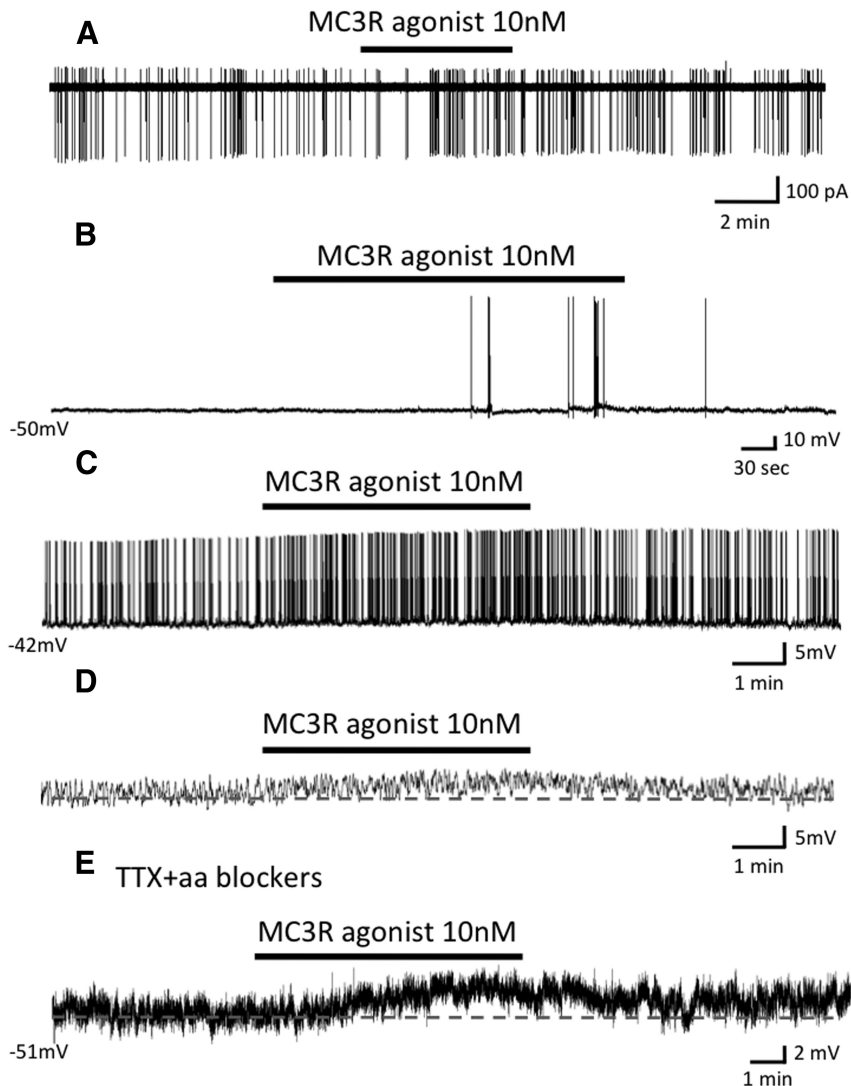

**FIG. 3.** MC3R agonist excites GnRH neurons. A, Representative loose-patch recording from a GnRH neuron excited by MC3R agonist. B, Current-clamp recording in whole-cell mode shows GnRH activation in response to MC3R agonist that was not accompanied by depolarization. In perforated-patch configuration (which keeps intact the intracellular milieu), MC3R increases GnRH cell firing, and unlike whole-cell mode, a small depolarization is detected (C and D). D, Membrane potential from the cell above after removing action potentials by Gaussian low-pass filtering (–3-dB cutoff at 0.8 Hz) in Clampfit (87). Also, in perforated-patch, the depolarization caused by MC3R treatment is maintained in presence of TTX and amino acid (aa) blockers (E).

elicited a potent and typically long-lasting increase in firing rate from four of six (66%) GnRH neurons recorded ( $N = 3$ ) (Fig. 2A). Voltage recordings in the whole-cell configuration showed a very similar long-lasting increase in the frequency of action potentials (Fig. 2B) in eight of 11 (72%) GnRH neurons ( $N = 5$ ). The increase in firing frequency was accompanied by a small membrane depolarization ( $2.9 \pm 0.5$  mV;  $N = 8$ ), although in two cases, an increase in membrane potential did not evoke action potential firing (Fig. 2C). When synaptic transmission was blocked using a cocktail of TTX and amino acid receptor blockers (6-cyano-7-ni-

troquinoxaline-2, 3-dione, 2-amino-5-phosphonopentanoic acid, and picrotoxin), the MC4R agonist was still able to depolarize three of five GnRH neurons ( $3.2 \pm 0.71$  mV) (Fig. 2D).

In loose-patch recordings, the MC3R agonist DTrp- $\gamma$  MSH at 10 nM (30) was also found to evoke a 1.5- to 2-fold increase in firing frequency in four of six (66%) GnRH neurons ( $n = 5$ ) (Fig. 3A). This response was more modest than that found with the MC4R agonist. Experiments undertaken in whole-cell mode also revealed an increase in firing rate in two out of four (50%) GnRH neurons, although in this case, no change in membrane potential was observed (Fig. 3B). Because the dialysis of the recorded cell by the contents of the patch pipette unavoidably alters its intracellular milieu, we tested the effects of the MC3R agonist using the perforated-patch approach that avoids this problem. Under these conditions, the MC3R agonist continued to increase the firing rate of GnRH neurons but was now also found to evoke a small increase in membrane potential ( $2.6 \pm 0.3$  mV) in three of four GnRH neurons ( $N = 4$ ) (Fig. 3, C and D). Using the same perforated-patch approach, but with inclusion of TTX and the amino acid receptor blockers, MC3R continued to depolarize three out of five GnRH neurons ( $2.3 \pm 0.1$  mV) (Fig. 3E).

### Effects of neuropeptides released by arcuate NPY neurons on GnRH neurons

To study the possible influence of arcuate NPY neurons on GnRH neuronal activity, we assessed the effects of different NPY receptors agonists and AgRP on GnRH neurons. Given the complexity of NPY pharmacology and the lack of pure agonists for each NPY receptor, we used a selection of mixed and highly selective agonists to evaluate the possible influence of each receptor (results summarized in Table 1, lower panel).

### pNPY (Y1/Y2/Y5 receptor agonist) inhibits GnRH neurons

GnRH neurons were tested initially with 100 and 300 nM (19, 31) pNPY using loose-patch recordings. Exposure to

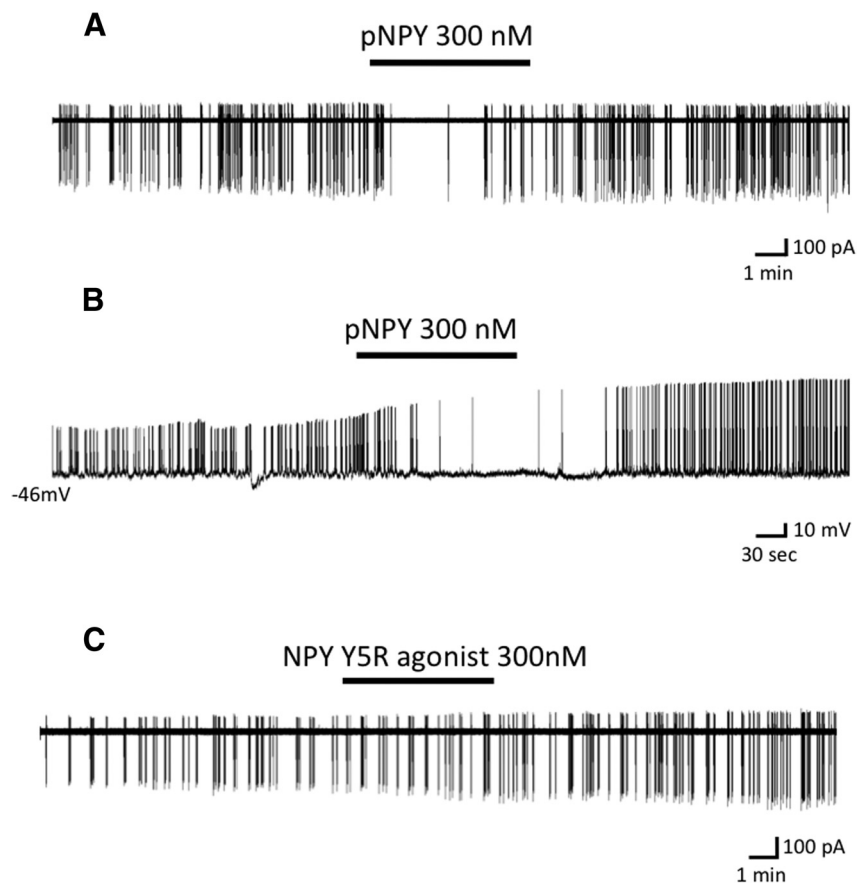

**FIG. 4.** Y1/Y2/Y5 receptor agonist pNPY inhibits, whereas Y5R agonist has no effect on GnRH neuron activity. **A**, Representative recording, in loose-patch mode, showing the significant inhibitory effect produced by pNPY, which was also confirmed in perforated-patch configuration (**B**). **C**, Y5R agonist does not affect GnRH neuron firing.

100 nM pNPY had no effect on GnRH neuron firing ( $N = 4$ ). However, treatment with 300 nM pNPY resulted in a robust  $66 \pm 13\%$  suppression of firing rate in six of 13 (46%) GnRH neurons ( $N = 5$ ) (Fig. 4A and Table 1, lower panel). Experiments using whole-cell and perforated-patch recording modes found the same effects of pNPY with two of five GnRH (40%) neurons ( $N = 3$ ) exhibiting a suppression of firing in response to 300 nM pNPY (Fig. 4B). There was no effect of pNPY on membrane potential in any of eight GnRH neurons tested in the absence of TTX and amino acid blockers.

#### A NPY Y5 receptor agonist has no effect on GnRH neuron firing rate

The above observation suggested that activation of Y1, Y2, and/or Y5 receptors inhibits GnRH neuron excitability. To define the receptors involved in this action, we examined the effect of [cPP1-7, NPY19-23, AL<sup>31</sup>, Aib<sup>32</sup>, Gln<sup>34</sup>]-hPP, a highly selective Y5 receptor agonist (32). Thirteen GnRH neurons ( $n = 9$ ) tested with 10, 100, and 300 nM concentrations of the Y5 agonist did not show any

response in loose-cell patch (Fig. 4C and Table 1, lower panel).

#### A Y1/Y4/Y5 receptor agonist [Leu<sup>31</sup>,Pro<sup>34</sup>]-NPY excites and inhibits GnRH neurons

The above two experiments indicated that Y1 and Y2 receptors were likely to be responsible for suppressing GnRH neuron firing rate. To differentiate this mechanism further, we tested the effects of [Leu<sup>31</sup>,Pro<sup>34</sup>]-NPY that has been used previously as a probe for Y1 actions on GnRH/LH release (33–35). Despite this, it is noteworthy that [Leu<sup>31</sup>,Pro<sup>34</sup>]-NPY also displays high affinity for Y4 and Y5 receptors (36). Because the Y5 receptor is not relevant for GnRH neurons, this agonist would effectively probe the effects of Y1 and Y4 activation in these cells.

Unexpectedly, loose-cell recordings showed that [Leu<sup>31</sup>,Pro<sup>34</sup>]-NPY could inhibit or excite GnRH neuron firing rate. Of six GnRH neurons exposed to 300 nM [Leu<sup>31</sup>,Pro<sup>34</sup>]-NPY, two were inhibited (21%) (Fig. 5A), three activated (1.5- to 2.6-fold increase) (Fig. 5, B and C), and the last cell was unresponsive ( $N = 5$ ). At a lower concentration of 100 nM, [Leu<sup>31</sup>,Pro<sup>34</sup>]-NPY (37) was only found to exert stimulatory effects on three of eight GnRH neurons ( $N = 4$ ) increasing their firing rate between 1.8- and 4.4-fold, whereas the other neurons were unresponsive (Table 1, lower panel).

Experiments using whole-cell and perforated-patch modes found that 300 nM [Leu<sup>31</sup>,Pro<sup>34</sup>]-NPY evoked membrane depolarization ( $4.7 \pm 1.4$  mV) in four of six GnRH neurons with or without associated changes in firing rate (Fig. 5, D and E). The membrane depolarization was maintained ( $3.4 \pm 0.9$  mV) in the presence of TTX and amino acid receptor blockers (Fig. 5F) with two of four GnRH neurons responding.

Overall, this set of studies showed that nine of 20 (45%) GnRH neurons were stimulated, and three of 20 (15%) inhibited by [Leu<sup>31</sup>,Pro<sup>34</sup>]-NPY.

#### rPP, a selective Y4 agonist, excites GnRH neurons

Because GnRH neurons were stimulated by a Y1/Y4/Y5 agonist but not by a Y5 agonist or a Y1/Y2/Y5 agonist, it seemed likely that the Y4 receptor was responsible for exciting GnRH neurons. We examined this by

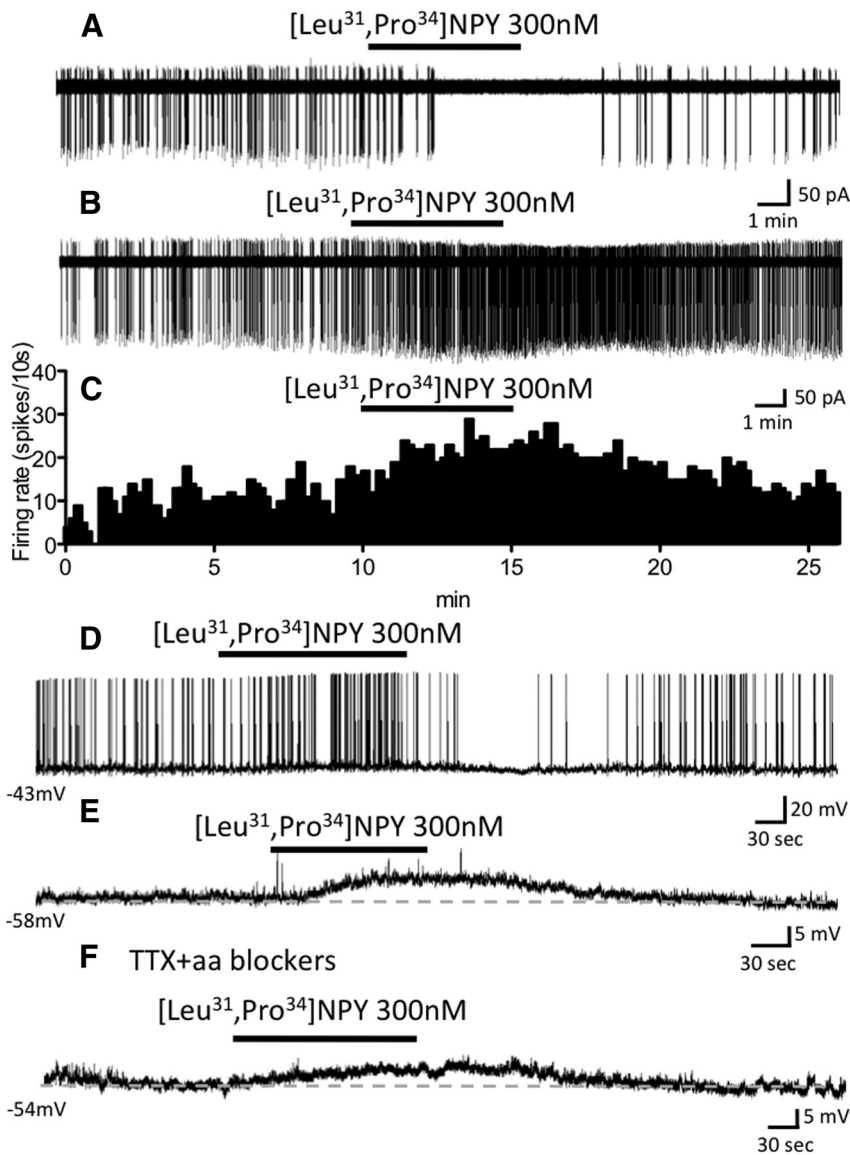

**FIG. 5.** Y1/Y4/Y5 receptor agonist [Leu<sup>31</sup>,Pro<sup>34</sup>]-NPY either inhibits or excites GnRH neurons. Loose-patch recordings show either inhibition (A) or excitation (B and C) of GnRH neurons in response to [Leu<sup>31</sup>,Pro<sup>34</sup>]-NPY. C, Frequency-time histogram illustrative of firing rate displayed by the cell presented above. D, Trace from a perforated-patch recording shows one cell that increased firing transiently, accompanied by depolarization. E, Depolarization induced by [Leu<sup>31</sup>,Pro<sup>34</sup>]-NPY did not evoke action potentials in some cells. F, The stimulatory effect of [Leu<sup>31</sup>,Pro<sup>34</sup>]-NPY on membrane potential persists in the presence of TTX and amino acid (aa) blockers.

testing the effects of rPP, a highly selective rat Y4 agonist (38), on GnRH neurons. Loose-patch recordings showed that 30 nM rPP (39) increased the firing rate of three of 11 GnRH neurons ( $N = 3$ ) (Fig. 6A). The magnitude of the response was from 1.6- to 6-fold. Treatment with 300 nM rPP evoked the same response from three of 10 GnRH neurons, although it was not possible to determine the fold increase as all three responsive cells were silent before testing ( $N = 5$ ) (Table 1, lower panel). In all cases, the activation was slow in onset, usually only seen in the immediate washout period (Fig. 6, A and B) and less striking

than that observed with [Leu<sup>31</sup>,Pro<sup>34</sup>]-NPY. This is probably due to the use of rPP, which differs from mouse PP by two amino acids, and will substantially reduce its potency at the mouse Y4 receptor (38). In perforated-patch experiments, 30 nM rPP significantly depolarized three of six GnRH neurons ( $3.4 \pm 0.9$  mV) with accompanied increases in firing rate (Fig. 6, B and C). The addition of TTX and amino acid blockers did not prevent this depolarization in a further two of four GnRH neurons ( $2.2 \pm 0.6$  mV) (Fig. 6D).

### AgRP exerts variable effects on a small number of GnRH neurons

In rodents, arcuate NPY neurons coexpress AgRP (40), an endogenous MC3R and MC4R (MC3/4R) antagonist (41, 42). Thirteen GnRH neurons ( $n = 6$ ) were tested with 10 nM AgRP (29), with one cell exhibiting a reduction of 38% in firing and three being excited between 1.3- and 10-fold (Table 1, lower panel). At 100 nM, AgRP had very similar actions, with one of 10 GnRH neurons ( $N = 4$ ) being inhibited by 49% (Fig. 7, A and B) and three (Fig. 7C) stimulated between 2.1- and 3.6-fold.

## Discussion

Signals of energy sufficiency are necessary for the onset of puberty and maintenance of reproductive function. However, the pathways conveying metabolic information to the neuronal network controlling fertility are only just beginning to be understood. We demonstrate here that approximately 70% of GnRH neurons are excited by  $\alpha$ -MSH acting through both MCR3 and MCR4 receptors on GnRH neurons. In contrast, AgRP, the endogenous antagonist at MCR3/4 receptors released by NPY neurons, exhibited variable effects upon GnRH neurons. Other POMC neuron neuropeptides, CART and  $\beta$ -endorphin, had only modest effects on a small number of GnRH neurons. Although the majority of GnRH neurons were modulated by NPY, this was found to involve NPY receptor-dependent excitatory (Y4) and inhibitory

Y1/Y4/Y5 receptor agonist [Leu<sup>31</sup>,Pro<sup>34</sup>]-NPY either inhibits or excites GnRH neurons. Loose-patch recordings show either inhibition (A) or excitation (B and C) of GnRH neurons in response to [Leu<sup>31</sup>,Pro<sup>34</sup>]-NPY. C, Frequency-time histogram illustrative of firing rate displayed by the cell presented above. D, Trace from a perforated-patch recording shows one cell that increased firing transiently, accompanied by depolarization. E, Depolarization induced by [Leu<sup>31</sup>,Pro<sup>34</sup>]-NPY did not evoke action potentials in some cells. F, The stimulatory effect of [Leu<sup>31</sup>,Pro<sup>34</sup>]-NPY on membrane potential persists in the presence of TTX and amino acid (aa) blockers.

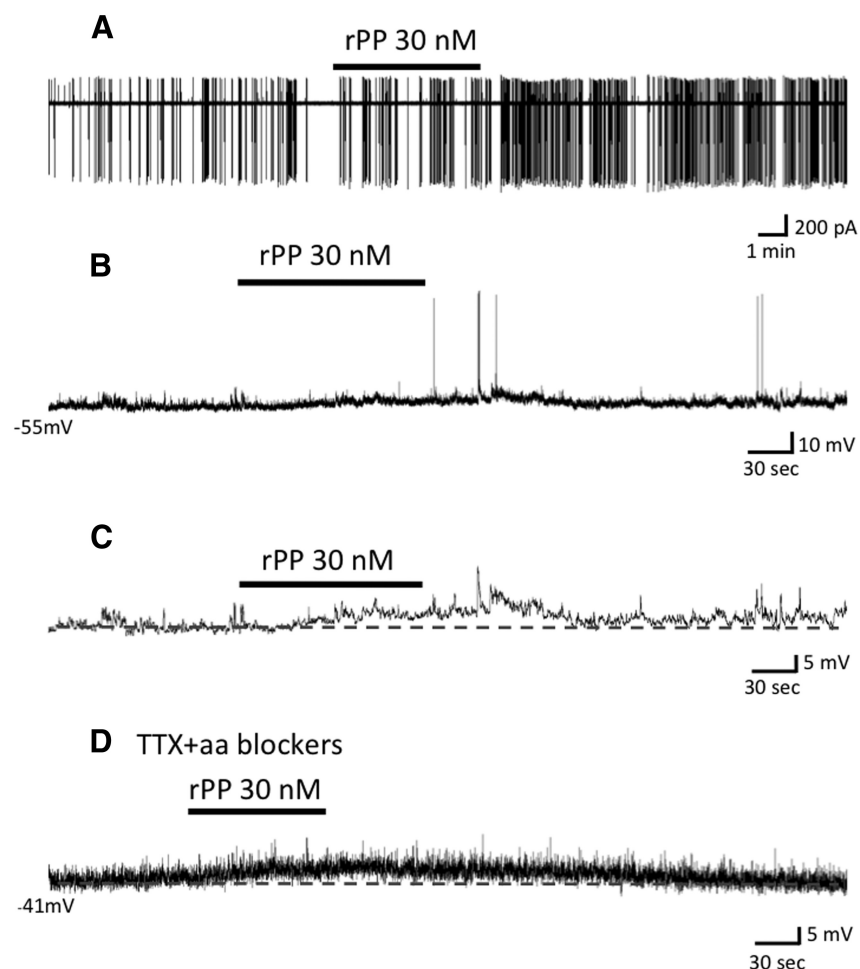

**FIG. 6.** Y4 receptor agonist rPP excites GnRH neurons. A, Representative recording, in loose-patch configuration, of the late onset activation produced by rPP on GnRH neurons. B and C, Current-clamp recording in perforated-patch mode shows GnRH activation in response to rPP agonist that is accompanied by an increase in membrane potential. C, Membrane potential from the cell above after removal of action potentials by Gaussian low-pass filtering ( $-3$ -dB cutoff at 0.8 Hz). D, Depolarization produced by rPP is preserved in the presence of TTX and amino acid (aa) blockers.

(Y1) actions. As is typical for GnRH neurons, we have found substantial heterogeneity in the response of GnRH neurons to the different POMC and NPY neuron-related peptides. The reasons for this remain unclear but may well result from the existence of intermingled subpopulations of GnRH neurons that have specific functions (43).

### Regulation of GnRH neuron excitability by POMC-related neuropeptides

Arcuate POMC neurons use multiple different neuropeptides, including  $\alpha$ -MSH,  $\beta$ -endorphin, and CART, to control food intake and energy homeostasis (44, 45). Immunocytochemical studies in rodents indicated that POMC neurons were also likely to be involved in regulating reproduction. POMC neurons project to the general vicinity of GnRH neuron cell bodies (46) and terminals immunoreactive for POMC-related peptides synapse on GnRH neuron cell bodies (18, 47). We now provide evi-

dence for a direct functional POMC neuron input to GnRH neurons in female mice. Although the majority of GnRH neurons were excited by potent, direct actions of  $\alpha$ -MSH, only relatively weak and inconsistent actions of the other POMC neuropeptides were found on GnRH neurons. Approximately 25% of GnRH neurons responded to CART with a modest increase in firing rate, but this was only evident at the highest concentration of CART tested ( $1 \mu\text{M}$ ). Fewer (18%) GnRH neurons responded to 500 nM  $\beta$ -endorphin with a suppression in firing. Because a previous study in the guinea pig had reported that 100% of postidentified GnRH neurons were inhibited by the  $\mu$ -opiate receptor agonist DAMGO (48), we tested GnRH neurons with 1 or  $10 \mu\text{M}$  DAMGO but found this peptide to have no effects. The relative inability of  $\beta$ -endorphin to influence mouse GnRH neuron firing found here is in good agreement with studies that have found no evidence for  $\mu$ -opiate receptors to be expressed by GnRH neurons (49, 50). Together, these studies show that  $\alpha$ -MSH is very likely to be the most important neuropeptide used by POMC neurons to regulate GnRH neuron excitability. The coreleased peptides  $\beta$ -endorphin and CART would appear to have little effect, although we cannot rule out pre-

synaptic actions on POMC terminals synapsing on GnRH neurons.

We demonstrate here that  $\alpha$ -MSH acts through both MC4R and MC3R receptors. The MC4R agonist produced a long-lasting depolarization in 60–70% of GnRH neurons, and this effect persisted in presence of TTX and amino acid ionotropic receptor antagonists, indicating the direct postsynaptic activation of GnRH neurons. A recent study has found that approximately 50% of GnRH neurons in male and female mice express MCR4 transcripts (51). The MC3R agonist was found to have the same stimulatory effect, although in this case, the membrane depolarization was not maintained in whole-cell mode and required perforated patch recordings for analysis. This suggests that the intracellular pathway coupling MC3R receptors (52, 53) to membrane depolarization is more sensitive than that of MCR4 receptors (54, 55) to intra-



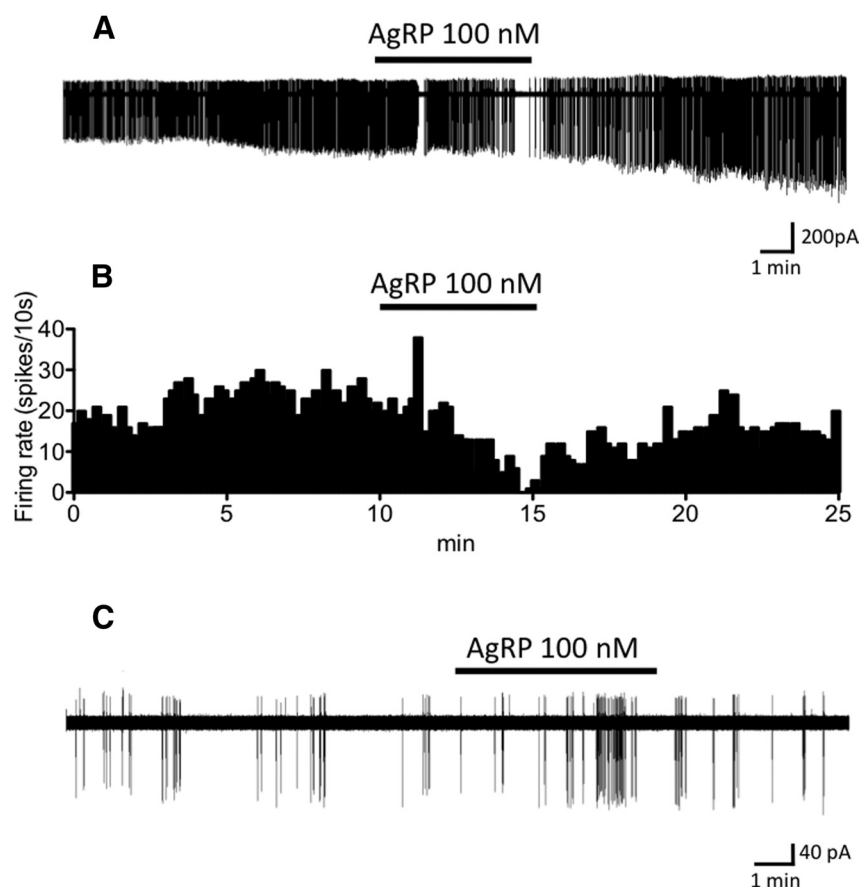

**FIG. 7.** AgRP either inhibits or excites GnRH neurons. AgRP either decreases (A and B) or increases (C) cell firing in a subpopulation of GnRH neurons. Representative recordings, in loose-patch mode, showing a significant inhibitory (A) or stimulatory (C) effect produced by AgRP on GnRH neurons. B, Frequency-time histogram illustrative of firing rate displayed by the cell shown in A.

cellular dialysis of the GnRH neuron with the patch pipette contents (56). Precisely how this comes about is not known, although the MCR3 and MCR4 receptors do use different second messenger pathways; for example only MCR3 uses inositol phosphate (55).

Although an important role exists for MCR3 and MCR4 receptors in controlling metabolism (57, 58), their function in the control of reproduction is less clear. Mice with targeted mutations of MCR3 or MCR4 are fertile but produce smaller, infrequent litters (58, 59). It is possible that this relatively mild reproductive phenotype results from compensation of one MCR for the other in knockout mouse lines. This proposal is compatible with the demonstration here that GnRH neurons express both MCR3 and MCR4 receptors and that they have very similar actions on GnRH neuron excitability.

Because MCR3/MCR4 activation depolarizes GnRH neurons, we anticipated that AgRP, the endogenous MCR3/4 antagonist (60), would have either no effect or an inhibitory action on GnRH neuron firing depending upon the level of on-going endogenous  $\alpha$ -MSH signaling in the

brain slice preparation. Although we found a small number of GnRH neurons (~10%) inhibited by AgRP, suggesting a low degree of tonic  $\alpha$ -MSH activity at the GnRH neuron, we were surprised to observe that approximately 25% of GnRH neurons were excited by this neuropeptide. Although this excitation may result from indirect effects, AgRP is known to exert effects on neural activity independent of MCR3/4 receptors in the brain (29, 61, 62). Interestingly, mice in which both MCR3 and MCR4 are antagonized by overexpression of AgRP are infertile (63), and a very recent study has demonstrated that MCR3/4 activation of peripubertal GnRH neuron firing is abolished by AgRP (51).

#### Regulation of GnRH neuron excitability by NPY

Previous studies have reported that GnRH neurons are likely to receive direct inputs from NPY neurons and that these afferents originate from the brain stem and ARN (17, 46, 64). We report here that NPY is able to exert both stimulatory and inhibitory actions on adult female GnRH neurons through Y4 and Y1 receptors, respectively. The complexity of NPY receptor pharmacology required us to define the receptors involved in these responses by subtractive analysis. Initially, we found that pNPY, active at Y1/Y2/Y5 receptors, robustly suppressed the firing of approximately 50% of GnRH neurons without a change in resting membrane potential. Because a Y5 receptor antagonist was found to have no effect, we supposed that the inhibitory response was mediated by Y1 or Y2 receptors. To differentiate this further, we used the [Leu<sup>31</sup>,Pro<sup>34</sup>]-NPY agonist active at Y1, Y4, and Y5 receptors. To our surprise, [Leu<sup>31</sup>,Pro<sup>34</sup>]-NPY stimulated approximately 50% and inhibited a further 30% of GnRH neurons. This unexpected stimulatory response resulted from the direct activation of postsynaptic receptors on GnRH neurons. Because it seemed most likely that Y4 receptors were responsible for exciting GnRH neurons, we tested rPP, selective for the Y4 receptor (65) and found it to evoke direct depolarizing actions in approximately 50% of GnRH neurons. Together, these studies show that NPY inhibits GnRH neuron excitability through Y1 receptors and stimulates them through Y4 receptors.

Previous studies have shown that NPY modulates  $\gamma$ -aminobutyric acid-ergic inputs to mouse GnRH neurons as well as calcium transients in cultured embryonic GnRH neurons through the Y1 receptor (66, 67). Also, in rats, NPY hyperpolarizes GnRH neurons by NPY through the Y5 receptor (19). Because we were unable to detect any effects of Y5 activation in the mouse, the latter observation suggests substantial species variation in the NPY regulation of GnRH neurons. Although there is evidence for stimulatory effects of Y4 receptor activation on the gonadotropic axis (68, 69), the deletion of Y4 signaling partially rescues infertility in ob/ob mice, suggesting a possible suppressive effect for Y4 signaling (70). However, this improvement in reproductive function could be attributed to the normalization of the corticosterone levels that has been recently revealed as main cause for the infertility in ob/ob mice (71). On the other hand, besides the direct stimulatory effects of Y4 signaling on GnRH neurons demonstrated here, other central and peripheral actions influencing the reproductive axis cannot be excluded. For example, recent analyses suggest that fasting indirectly inhibits the gonadotropic axis through Y4 receptors (72).

The observation that GnRH neurons are likely to express Y4 receptors is intriguing. PP is considered the endogenous ligand for the Y4 receptor, and although peripheral PP administration can activate Y4 receptors, PP is not synthesized in the brain (73). Furthermore, NPY affinity for the Y4 receptor is over 1000-fold lower than that for Y1 receptors (74). This suggests that the effects of endogenous NPY on GnRH neurons would be dominated by inhibitory Y1 receptor-mediated events. However, one possible role for Y4 receptors on GnRH neurons may be through sensing circulating PP concentrations in the periphery, because these neurons extend their dendrites outside the blood-brain barrier (75).

### Integration of metabolic and reproductive neuronal circuitries

As might be expected, multiple pathways exist for the metabolic regulation of the neuronal network controlling reproduction. In addition to direct effects of glucose concentration on GnRH neuron activity (76), inputs from hypothalamic melanin-concentrating hormone neurons (77) and leptin-sensing ventral premammillary nucleus neurons (9–11) play a role. We now provide functional evidence that arcuate POMC and NPY neurons represent another such input. The POMC and NPY neurons are in an ideal position to integrate a wide variety of metabolic parameters, including leptin, insulin, ghrelin, and leucine concentrations (78–80), and to coordinate feeding and reproduction. Conditions favoring high NPY and low POMC neuron activity, as found at times of poor nutrition

(81), will stimulate feeding and, as shown here, provide the necessary suppression of fertility by decreasing GnRH neuron excitability through reduced stimulatory  $\alpha$ -MSH drive and increased inhibitory Y1 receptor-mediated NPY release. The relative contribution of the POMC/NPY inputs to GnRH neurons in mediating metabolic cues has yet to be established, although it is notable that the infertility of leptin receptor deleted mice can be rescued by breeding them onto either NPY or Y1 receptor knockout mouse lines (82) or by ablating AgRP (51). Because NPY- and MSH-related compounds are presently being developed as antiobesity therapies (65), the present results suggest that it will also be important to consider their effects on human fertility.

### Acknowledgments

We thank Dr. M. Tena-Sempere, Dr. L. Pinilla, Dr. S. Constantin, Dr. X. Liu, Dr. R. Piet, Dr. and K. Iremonger for helpful discussions and comments on an earlier version of the manuscript.

Address all correspondence and requests for reprints to: Allan E. Herbison, Centre for Neuroendocrinology, Department of Physiology, University of Otago School of Medical Sciences, Dunedin 9054, New Zealand. E-mail: allan.herbison@otago.ac.nz.

This work was supported by the Marie Curie International Outgoing Fellowships of 7th Framework Program of the European Union and the New Zealand Health Research Council.

Disclosure Summary: The authors have nothing to disclose.

### References

1. Crown A, Clifton DK, Steiner RA 2007 Neuropeptide signaling in the integration of metabolism and reproduction. *Neuroendocrinology* 86:175–182
2. Roa J, García-Galiano D, Castellano JM, Gaytan F, Pinilla L, Tena-Sempere M 2010 Metabolic control of puberty onset: new players, new mechanisms. *Mol Cell Endocrinol* 324:87–94
3. Group ECW 2006 Nutrition and reproduction in women. *Hum Reprod Update* 12:193–207
4. Wade GN, Jones JE 2004 Neuroendocrinology of nutritional infertility. *Am J Physiol Regul Integr Comp Physiol* 287:R1277–R1296
5. Pralong FP 2010 Insulin and NPY pathways and the control of GnRH function and puberty onset. *Mol Cell Endocrinol* 324:82–86
6. Quenell JH, Mulligan AC, Tups A, Liu X, Phipps SJ, Kemp CJ, Herbison AE, Grattan DR, Anderson GM 2009 Leptin indirectly regulates gonadotropin-releasing hormone neuronal function. *Endocrinology* 150:2805–2812
7. Louis GW, Greenwald-Yarnell M, Phillips R, Coolen LM, Lehman MN, Myers Jr MG 2011 Molecular mapping of the neural pathways linking leptin to the neuroendocrine reproductive axis. *Endocrinology* 152:2302–2310
8. Divall SA, Williams TR, Carver SE, Koch L, Brüning JC, Kahn CR, Wondisford F, Radovick S, Wolfe A 2010 Divergent roles of growth factors in the GnRH regulation of puberty in mice. *J Clin Invest* 120:2900–2909

9. Donato Jr J, Cravo RM, Frazão R, Gautron L, Scott MM, Lachey J, Castro IA, Margatho LO, Lee S, Lee C, Richardson JA, Friedman J, Chua Jr S, Coppari R, Zigman JM, Elmquist JK, Elias CF 2011 Leptin's effect on puberty in mice is relayed by the ventral premammillary nucleus and does not require signaling in Kiss1 neurons. *J Clin Invest* 121:355–368
10. Donato Jr J, Silva RJ, Sita LV, Lee S, Lee C, Lacchini S, Bittencourt JC, Franci CR, Canteras NS, Elias CF 2009 The ventral premammillary nucleus links fasting-induced changes in leptin levels and coordinated luteinizing hormone secretion. *J Neurosci* 29:5240–5250
11. Leshan RL, Louis GW, Jo YH, Rhodes CJ, Münzberg H, Myers Jr MG 2009 Direct innervation of GnRH neurons by metabolic- and sexual odorant-sensing leptin receptor neurons in the hypothalamic ventral premammillary nucleus. *J Neurosci* 29:3138–3147
12. Schwartz MW 2001 Brain pathways controlling food intake and body weight. *Exp Biol Med* 226:978–981
13. van de Wall E, Leshan R, Xu AW, Balthasar N, Coppari R, Liu SM, Jo YH, MacKenzie RG, Allison DB, Dun NJ, Elmquist J, Lowell BB, Barsh GS, de Luca C, Myers Jr MG, Schwartz GJ, Chua Jr SC 2008 Collective and individual functions of leptin receptor modulated neurons controlling metabolism and ingestion. *Endocrinology* 149:1773–1785
14. Balthasar N, Coppari R, McMinn J, Liu SM, Lee CE, Tang V, Kenny CD, McGovern RA, Chua Jr SC, Elmquist JK, Lowell BB 2004 Leptin receptor signaling in POMC neurons is required for normal body weight homeostasis. *Neuron* 42:983–991.
15. Hill JW, Elias CF, Fukuda M, Williams KW, Berglund ED, Holland WL, Cho YR, Chuang JC, Xu Y, Choi M, Lauzon D, Lee CE, Coppari R, Richardson JA, Zigman JM, Chua S, Scherer PE, Lowell BB, Brüning JC, Elmquist JK 2010 Direct insulin and leptin action on pro-opiomelanocortin neurons is required for normal glucose homeostasis and fertility. *Cell Metab* 11:286–297
16. Wintermantel TM, Campbell RE, Porteous R, Bock D, Gröne HJ, Todman MG, Korach KS, Greiner E, Pérez CA, Schütz G, Herbison AE 2006 Definition of estrogen receptor pathway critical for estrogen positive feedback to gonadotropin-releasing hormone neurons and fertility. *Neuron* 52:271–280
17. Turi GF, Liposits Z, Moenter SM, Fekete C, Hrabovszky E 2003 Origin of neuropeptide Y-containing afferents to gonadotropin-releasing hormone neurons in male mice. *Endocrinology* 144:4967–4974
18. Leranth C, MacLusky NJ, Shanabrough M, Naftolin F 1988 Immunohistochemical evidence for synaptic connections between pro-opiomelanocortin-immunoreactive axons and LH-RH neurons in the preoptic area of the rat. *Brain Res* 449:167–176
19. Xu J, Kirigiti MA, Cowley MA, Grove KL, Smith MS 2009 Suppression of basal spontaneous gonadotropin-releasing hormone neuronal activity during lactation: role of inhibitory effects of neuropeptide Y. *Endocrinology* 150:333–340
20. Spergel DJ, Krüth U, Hanley DF, Sprengel R, Seeburg PH 1999 GABA- and glutamate-activated channels in green fluorescent protein-tagged gonadotropin-releasing hormone neurons in transgenic mice. *J Neurosci* 19:2037–2050
21. Han SK, Gottsch ML, Lee KJ, Popa SM, Smith JT, Jakawich SK, Clifton DK, Steiner RA, Herbison AE 2005 Activation of gonadotropin-releasing hormone neurons by kisspeptin as a neuroendocrine switch for the onset of puberty. *J Neurosci* 25:11349–11356
22. Hill RP, Wheeler P, MacNeil S, Haycock JW 2005  $\alpha$ -Melanocyte stimulating hormone cytoprotective biology in human dermal fibroblast cells. *Peptides* 26:1150–1158
23. Korotkova TM, Brown RE, Sergeeva OA, Ponomarenko AA, Haas HL 2006 Effects of arousal- and feeding-related neuropeptides on dopaminergic and GABAergic neurons in the ventral tegmental area of the rat. *Eur J Neurosci* 23:2677–2685
24. Lebrethon MC, Vandersmissen E, Gérard A, Parent AS, Bourguignon JP 2000 Cocaine and amphetamine-regulated-transcript peptide mediation of leptin stimulatory effect on the rat gonadotropin-releasing hormone pulse generator in vitro. *J Neuroendocrinol* 12:383–385
25. Wayne NL, Kuwahara K 2007  $\beta$ -Endorphin alters electrical activity of gonadotropin releasing hormone neurons located in the terminal nerve of the teleost medaka (*Oryzias latipes*). *Gen Comp Endocrinol* 150:41–47
26. Pennock RL, Hentges ST 2011 Differential expression and sensitivity of presynaptic and postsynaptic opioid receptors regulating hypothalamic proopiomelanocortin neurons. *J Neurosci* 31:281–288
27. Krasnow S, Steiner R 2006 Physiological mechanisms integrating metabolism and reproduction. In: Neill JD, ed. *Knobil and Neill's physiology of reproduction*. 3rd ed. St. Louis: Elsevier; 2553–2625
28. Mountjoy K 2010 Distribution and function of melanocortin receptors within the brain. In: Catania A, ed. *Melanocortins: multiple actions and therapeutic potential*. New York: Landes Bioscience and Springer Science+Business Media; 29–48
29. Fu LY, van den Pol AN 2008 Agouti-related peptide and MC3/4 receptor agonists both inhibit excitatory hypothalamic ventromedial nucleus neurons. *J Neurosci* 28:5433–5449
30. Smith MA, Hisadome K, Al-Qassab H, Heffron H, Withers DJ, Ashford ML 2007 Melanocortins and agouti-related protein modulate the excitability of two arcuate nucleus neuron populations by alteration of resting potassium conductances. *J Physiol* 578:425–438
31. Sosulina L, Schwesig G, Seifert G, Pape HC 2008 Neuropeptide Y activates a G-protein-coupled inwardly rectifying potassium current and dampens excitability in the lateral amygdala. *Mol Cell Neurosci* 39:491–498
32. Cabrele C, Langer M, Bader R, Wieland HA, Doods HN, Zerbe O, Beck-Sickingler AG 2000 The first selective agonist for the neuropeptide YY5 receptor increases food intake in rats. *J Biol Chem* 275:36043–36048
33. Kalra SP, Fuentes M, Fournier A, Parker SL, Crowley WR 1992 Involvement of the Y-1 receptor subtype in the regulation of luteinizing hormone secretion by neuropeptide Y in rats. *Endocrinology* 130:3323–3330
34. Leupen SM, Besecke LM, Levine JE 1997 Neuropeptide Y Y1-receptor stimulation is required for physiological amplification of pre-ovulatory luteinizing hormone surges. *Endocrinology* 138:2735–2739
35. Besecke LM, Wolfe AM, Pierce ME, Takahashi JS, Levine JE 1994 Neuropeptide Y stimulates luteinizing hormone-releasing hormone release from superfused hypothalamic GT1-7 cells. *Endocrinology* 135:1621–1627
36. Raposinho PD, Broqua P, Pierroz DD, Hayward A, Dumont Y, Quirion R, Junien JL, Aubert ML 1999 Evidence that the inhibition of luteinizing hormone secretion exerted by central administration of neuropeptide Y (NPY) in the rat is predominantly mediated by the NPY-Y5 receptor subtype. *Endocrinology* 140:4046–4055
37. Browning KN, Travagli RA 2003 Neuropeptide Y and peptide YY inhibit excitatory synaptic transmission in the rat dorsal motor nucleus of the vagus. *J Physiol* 549:775–785
38. Michel MC, Beck-Sickingler A, Cox H, Doods HN, Herzog H, Larhammar D, Quirion R, Schwartz T, Westfall T 1998 XVI. international union of pharmacology recommendations for the nomenclature of neuropeptide Y, peptide YY, and pancreatic polypeptide receptors. *Pharmacol Rev* 50:143–150
39. Rhim H, Kinney GA, Emmerson PJ, Miller RJ 1997 Regulation of neurotransmission in the arcuate nucleus of the rat by different neuropeptide Y receptors. *J Neurosci* 17:2980–2989
40. Hahn TM, Breininger JF, Baskin DG, Schwartz MW 1998 Coexpression of Agrp and NPY in fasting-activated hypothalamic neurons. *Nat Neurosci* 1:271–272
41. Ollmann MM, Wilson BD, Yang YK, Kerns JA, Chen Y, Gantz I,

- Barsh GS 1997 Antagonism of central melanocortin receptors in vitro and in vivo by agouti-related protein. *Science* 278:135–138
42. Cone RD 2005 Anatomy and regulation of the central melanocortin system. *Nat Neurosci* 8:571–578
  43. Herbison AE 2006 Physiology of the gonadotropin-releasing hormone neuronal network. In: Neill J, ed. *The physiology of reproduction*. San Diego: Elsevier; 1415–1482
  44. Coll AP, Farooqi IS, Challis BG, Yeo GS, O’Rahilly S 2004 Proopiomelanocortin and energy balance: insights from human and murine genetics. *J Clin Endocrinol Metab* 89:2557–2562
  45. Hentges ST, Otero-Corchon V, Pennock RL, King CM, Low MJ 2009 Proopiomelanocortin expression in both GABA and glutamate neurons. *J Neurosci* 29:13684–13690
  46. Simonian SX, Spratt DP, Herbison AE 1999 Identification and characterization of estrogen receptor  $\alpha$ -containing neurons projecting to the vicinity of the gonadotropin-releasing hormone perikarya in the rostral preoptic area of the rat. *J Comp Neurol* 411:346–358
  47. Chen WP, Witkin JW, Silverman AJ 1989  $\beta$ -Endorphin and gonadotropin-releasing hormone synaptic input to gonadotropin-releasing hormone neurosecretory cells in the male rat. *J Comp Neurol* 286:85–95
  48. Lagrange AH, Rønnekleiv OK, Kelly MJ 1995 Estradiol-17 $\beta$  and  $\mu$ -opioid peptides rapidly hyperpolarize GnRH neurons: a cellular mechanism of negative feedback? *Endocrinology* 136:2341–2344
  49. Sannella MI, Petersen SL 1997 Dual label in situ hybridization studies provide evidence that luteinizing hormone-releasing hormone neurons do not synthesize messenger ribonucleic acid for  $\mu$ ,  $\kappa$ , or  $\delta$  opiate receptors. *Endocrinology* 138:1667–1672
  50. Mitchell V, Prevot V, Jennes L, Aubert JP, Croix D, Beauvillain JC 1997 Presence of  $\mu$  and  $\kappa$  opioid receptor mRNAs in galanin but not in GnRH neurons in the female rat. *Neuroreport* 8:3167–3172
  51. Israel DD, Sheffer-Babila S, de Luca C, Jo YH, Liu SM, Xia Q, Spergel DJ, Dun SL, Dun NJ, Chua Jr SC 2012 Effects of leptin and melanocortin signaling interactions on pubertal development and reproduction. *Endocrinology* 153:2408–2419
  52. Wachira SJ, Hughes-Darden CA, Taylor CV, Ochillo R, Robinson TJ 2003 Evidence for the interaction of protein kinase C and melanocortin 3-receptor signaling pathways. *Neuropeptides* 37:201–210
  53. Konda Y, Gantz I, DelValle J, Shimoto Y, Miwa H, Yamada T 1994 Interaction of dual intracellular signaling pathways activated by the melanocortin-3 receptor. *J Biol Chem* 269:13162–13166
  54. Daniels D, Patten CS, Roth JD, Yee DK, Fluharty SJ 2003 Melanocortin receptor signaling through mitogen-activated protein kinase in vitro and in rat hypothalamus. *Brain Res* 986:1–11
  55. Kim CS, Lee SH, Kim RY, Kim BJ, Li SZ, Lee IH, Lee EJ, Lim SK, Bae YS, Lee W, Baik JH 2002 Identification of domains directing specificity of coupling to G-proteins for the melanocortin MC3 and MC4 receptors. *J Biol Chem* 277:31310–31317
  56. Lacerda AE, Rampe D, Brown AM 1988 Effects of protein kinase C activators on cardiac Ca<sup>2+</sup> channels. *Nature* 335:249–251
  57. Butler AA, Cone RD 2002 The melanocortin receptors: lessons from knockout models. *Neuropeptides* 36:77–84
  58. Begriche K, Levasseur PR, Zhang J, Rossi J, Skorupa D, Solt LA, Young B, Burris TP, Marks DL, Mynatt RL, Butler AA 2011 Genetic dissection of the functions of the melanocortin-3 receptor, a seven-transmembrane G-protein-coupled receptor, suggests roles for central and peripheral receptors in energy homeostasis. *J Biol Chem* 286:40771–40781
  59. Sandrock M, Schulz A, Merkwitz C, Schöneberg T, Spänzel-Borowski K, Ricken A 2009 A Reduction in corpora lutea number in obese melanocortin-4-receptor-deficient mice. *Reprod Biol Endocrinol* 7:24
  60. Broberger C, Johansen J, Johansson C, Schalling M, Hökfelt T 1998 The neuropeptide Y/agouti gene-related protein (AGRP) brain circuitry in normal, anorectic, and monosodium glutamate-treated mice. *Proc Natl Acad Sci USA* 95:15043–15048
  61. Marsh DJ, Miura GI, Yagaloff KA, Schwartz MW, Barsh GS, Palmiter RD 1999 Effects of neuropeptide Y deficiency on hypothalamic agouti-related protein expression and responsiveness to melanocortin analogues. *Brain Res* 848:66–77
  62. Pritchard LE, White A 2005 Agouti-related protein: more than a melanocortin-4 receptor antagonist? *Peptides* 26:1759–1770
  63. Granholm NH, Jeppesen KW, Japs RA 1986 Progressive infertility in female lethal yellow mice (Ay/a; strain C57BL/6J). *J Reprod Fert* 76:279–287
  64. Li C, Chen P, Smith MS 1999 Morphological evidence for direct interaction between arcuate nucleus neuropeptide Y (NPY) neurons and gonadotropin-releasing hormone neurons and the possible involvement of NPY Y1 receptors. *Endocrinology* 140:5382–5390
  65. Yulyaningsih E, Zhang L, Herzog H, Sainsbury A 2011 NPY receptors as potential targets for anti-obesity drug development. *Br J Pharmacol* 163:1170–1202
  66. Sullivan SD, Moenter SM 2004  $\gamma$ -Aminobutyric acid neurons integrate and rapidly transmit permissive and inhibitory metabolic cues to gonadotropin-releasing hormone neurons. *Endocrinology* 145:1194–1202
  67. Klenke U, Constantin S, Wray S 2010 Neuropeptide Y directly inhibits neuronal activity in a subpopulation of gonadotropin-releasing hormone-1 neurons via Y1 receptors. *Endocrinology* 151:2736–2746
  68. Horvath TL, Pu S, Dube MG, Diano S, Kalra SP 2001 A GABA-neuropeptide Y (NPY) interplay in LH release. *Peptides* 22:473–481
  69. Raposinho PD, Broqua P, Hayward A, Akinsanya K, Galyean R, Schteingart C, Junien J, Aubert ML 2000 Stimulation of the gonadotropin axis by the neuropeptide Y receptor Y1 antagonist/ Y4 agonist 1229U91 in the male rat. *Neuroendocrinology* 71:2–7
  70. Sainsbury A, Schwarzer C, Couzens M, Jenkins A, Oakes SR, Ormandy CJ, Herzog H 2002 Y4 receptor knockout rescues fertility in ob/ob mice. *Genes Dev* 16:1077–1088
  71. Wang O, Sakihara S, Gudmundsson K, Majzoub J, Leptin is not required for fertility. The Endocrine Society’s 94th Annual Meeting and Expo, Houston, 2012
  72. Lin S, Lin EJ, Boey D, Lee NJ, Slack K, During MJ, Sainsbury A, Herzog H 2007 Fasting inhibits the growth and reproductive axes via distinct Y2 and Y4 receptor-mediated pathways. *Endocrinology* 148:2056–2065
  73. Sainsbury A, Shi YC, Zhang L, Aljanova A, Lin Z, Nguyen AD, Herzog H, Lin S 2010 Y4 receptors and pancreatic polypeptide regulate food intake via hypothalamic orexin and brain-derived neurotrophic factor dependent pathways. *Neuropeptides* 44:261–268
  74. Yan H, Yang J, Marasco J, Yamaguchi K, Brenner S, Collins F, Karbon W 1996 Cloning and functional expression of cDNAs encoding human and rat pancreatic polypeptide receptors. *Proc Natl Acad Sci USA* 93:4661–4665
  75. Herde MK, Geist K, Campbell RE, Herbison AE 2011 Gonadotropin-releasing hormone neurons extend complex highly branched dendritic trees outside the blood-brain barrier. *Endocrinology* 152:3832–3841
  76. Roland AV, Moenter SM 2011 Prenatal androgenization of female mice programs an increase in firing activity of gonadotropin-releasing hormone (GnRH) neurons that is reversed by metformin treatment in adulthood. *Endocrinology* 152:618–628
  77. Wu M, Dumalska I, Morozova E, van den Pol A, Alreja M 2009 Melanin-concentrating hormone directly inhibits GnRH neurons and blocks kisspeptin activation, linking energy balance to reproduction. *Proc Natl Acad Sci USA* 106:17217–17222
  78. Blouet C, Jo YH, Li X, Schwartz GJ 2009 Mediobasal hypothalamic leucine sensing regulates food intake through activation of a hypothalamus-brainstem circuit. *J Neurosci* 29:8302–8311
  79. Cowley MA, Smart JL, Rubinstein M, Cerdán MG, Diano S, Horvath TL, Cone RD, Low MJ 2001 Leptin activates anorexigenic POMC neurons through a neural network in the arcuate nucleus. *Nature* 411:480–484

80. Schwartz MW, Morton GJ 2002 Obesity: keeping hunger at bay. *Nature* 418:595–597
81. Minor RK, Chang JW, de Cabo R 2009 Hungry for life: how the arcuate nucleus and neuropeptide Y may play a critical role in mediating the benefits of calorie restriction. *Mol Cell Endocrinol* 299: 79–88
82. Lin S, Boey D, Herzog H 2004 NPY and Y receptors: lessons from transgenic and knockout models. *Neuropeptides* 38:189–200
83. Gerald C, Walker MW, Criscione L, Gustafson EL, Batzl-Hartmann C, Smith KE, Vaysse P, Durkin MM, Laz TM, Linemeyer DL, Schaffhauser AO, Whitebread S, Hofbauer KG, Taber RI, Branchek TA, Weinshank RL 1996 A receptor subtype involved in neuropeptide-Y-induced food intake. *Nature* 382:168–171
84. Wyss P, Stricker-Krongrad A, Brunner L, Miller J, Crossthwaite A, Whitebread S, Criscione L 1998 The pharmacology of neuropeptide Y (NPY) receptor-mediated feeding in rats characterizes better Y5 than Y1, but not Y2 or Y4 subtypes. *Regul Pept* 75–76:363–371
85. Sun L, Miller RJ 1999 Multiple neuropeptide Y receptors regulate K<sup>+</sup> and Ca<sup>2+</sup> channels in acutely isolated neurons from the rat arcuate nucleus. *J Neurophysiol* 81:1391–1403
86. Dumont Y, Gaudreau P, Mazzuferi M, Langlois D, Chabot JG, Fournier A, Simonato M, Quirion R 2005 BODIPY-conjugated neuropeptide Y ligands: new fluorescent tools to tag Y1, Y2, Y4 and Y5 receptor subtypes. *Br J Pharmacol* 146:1069–1081
87. Wang YF, Hatton GI 2007 Dominant role of  $\beta\gamma$  subunits of G-proteins in oxytocin-evoked burst firing. *J Neurosci* 27:1902–1912

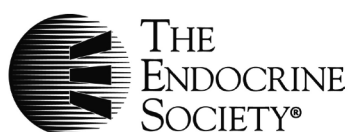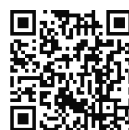

Members can search for endocrinology conferences,  
meetings and webinars on the **Worldwide Events Calendar**.

[www.endo-society.org/calendar](http://www.endo-society.org/calendar)
